# Supplementary material
Source: publisher site journal article supplement (https://www.spandidos-publications.com/1071/downloadSupplementary)

Figure S1. (A and B) A549 and HCC827 cells were infected with a lentivirus carrying ORP8 cDNA, and ORP8 overexpression efficiency was detected using western blotting. (C) A549 cells were infected with a lentivirus carrying ORP8 cDNA, and the cleaved caspase-3 and caspase-9 levels were assessed using western blotting. The data represent the mean  $\pm$  SD of three individual experiments (\*\*\*) $P$ <0.001,  $n$ =3). ORP8, oxysterol-binding related-protein 8.

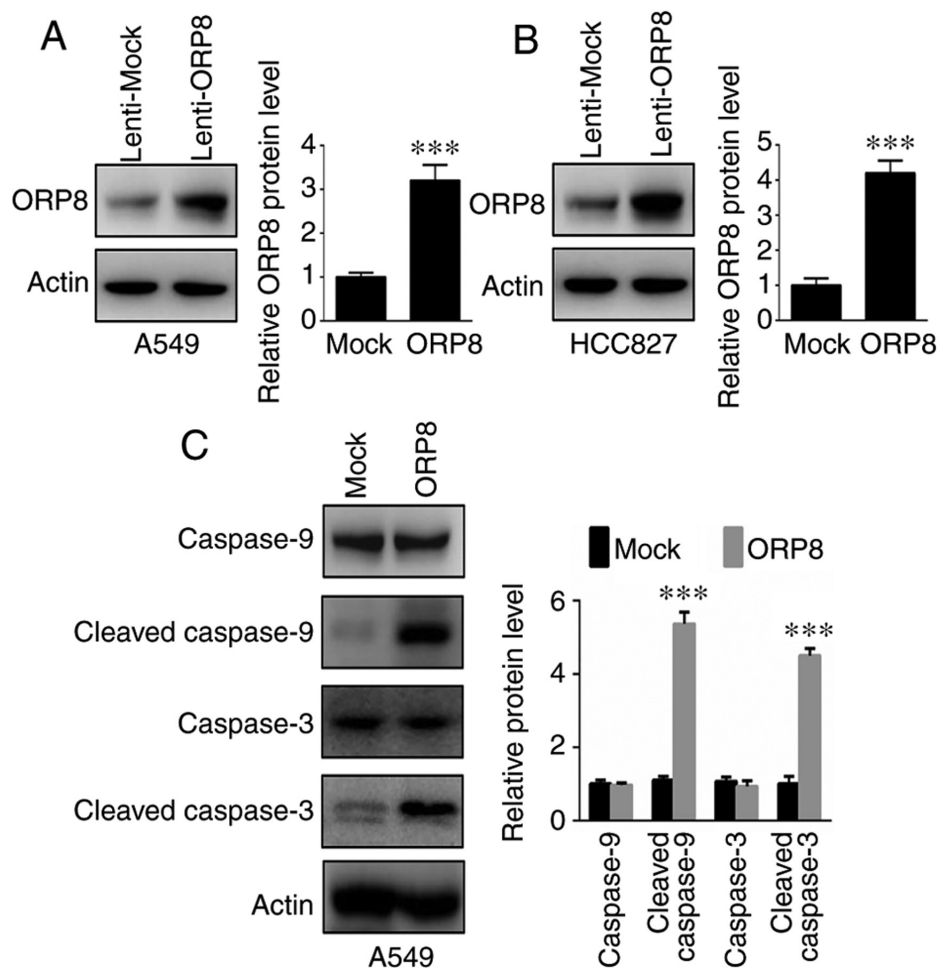

Figure S2. (A and B) H1975 and A549 cells were infected with a lentivirus carrying ORP8 cDNA, and the relative Chop and Bip protein levels were detected by western blotting. (C and D) Proteins from different organelles were extracted and detected by western blotting and normalized to COX4 in mitochondria and actin in the cytosol in A549 and HCC827 cells. The data represent the mean  $\pm$  SD of three individual experiments (\*\* $P < 0.01$  and \*\*\* $P < 0.001$ ,  $n = 3$ ). ORP8, oxysterol-binding related-protein 8.

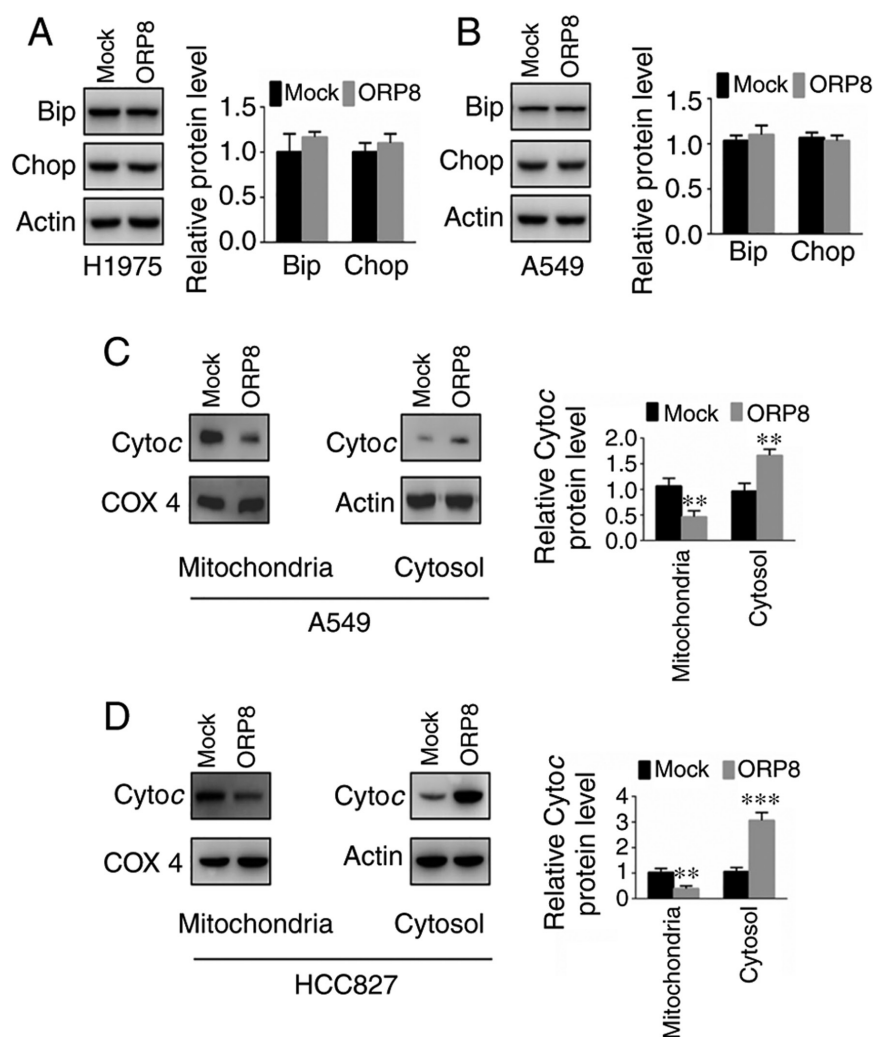

Figure S3. (A and B) The relative expression of miR-421 in H1975 and A549 cells was analyzed by qPCR after infection with miR-421 mimic or inhibitor. (C) A549 cells infected with a control or an inhibitor of miR-421, and the protein level of ORP8 was detected by western blotting. (D) A549 cells infected with a control or miR-421 mimic, and ORP8 the protein level of ORP8 was detected by western blotting. The data represent the mean  $\pm$  SD of three individual experiments (\*\* $P$ <0.01, \*\*\* $P$ <0.001,  $n$ =3). ORP8, oxysterol-binding related-protein 8.

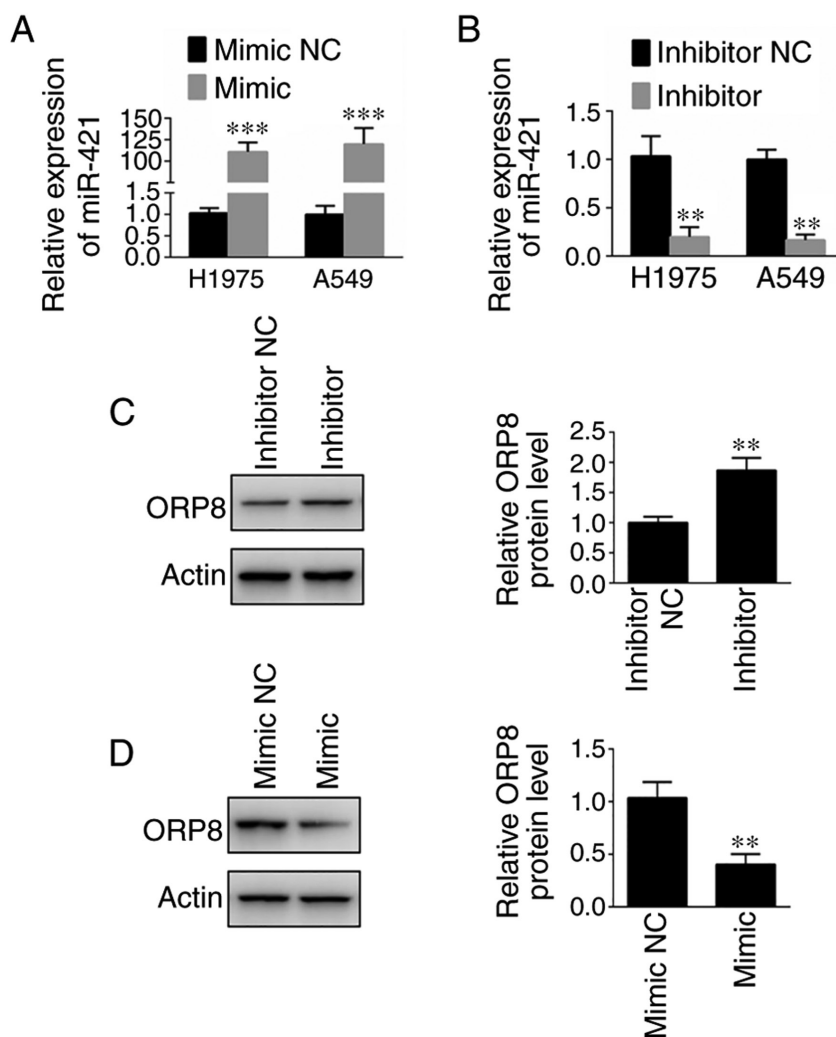

Supplement: Supplementary file 1 [file downloadSupplementary]
